# Supplementary material for: Changes in Thyroid Metabolites after Liothyronine Administration: A Secondary Analysis of Two Clinical Trials That Incorporated Pharmacokinetic Data
Source: MDPI journal article supplement (doi:10.3390/metabo12060476), 2022-05-24
Supplement: s1 [file s1]

## Supplementary Material: Study Data

| patient | time_Pk | treatment | TSH   | T4   | T3    | FT4  |
|---------|---------|-----------|-------|------|-------|------|
| 1       | 0       | 30        | 12    | 3.1  | 84.3  | 0.43 |
| 2       | 0       | 30        | 0.566 | 8.1  | 184.6 | 0.92 |
| 3       | 0       | 30        | 3.4   | 3.5  | 69.4  | 0.68 |
| 4       | 0       | 30        | 2.42  | 7.2  | 97.8  | 1.03 |
| 5       | 0       | 30        | 1.8   | 11.1 | 156.2 | 0.84 |
| 6       | 0       | 30        | 7.21  | 1.1  | 59.6  | 0.29 |
| 7       | 0       | 30        | 11.2  | 0.9  | 78.3  | 0.19 |
| 8       | 0       | 30        | 4.22  | 1.1  | 84.9  | 0.28 |
| 9       | 0       | 30        | 4.8   | 2.5  | 86.6  | 0.27 |
| 10      | 0       | 30        | 1.22  | 4.7  | 75.1  | 0.41 |
| 11      | 0       | 30        | 1.27  | 3.4  | 104   | 0.69 |
| 12      | 0       | 30        | 0.153 | 1.3  | 103.7 | 0.21 |
| 13      | 0       | 30        | 3.93  | 7.9  | 124.8 | 0.82 |
| 14      | 0       | 30        | 2.07  | 1.3  | 98.6  | 0.16 |
| 15      | 0       | 30        | 0.038 | 1.3  | 104.8 | 0.1  |
| 16      | 0       | 30        | 8.93  | 0.5  | 59.6  | 0.1  |
| 17      | 0       | 30        | 2.45  | 4.9  | 83.6  | 0.45 |
| 18      | 0       | 30        | 1.52  | 1.7  | 74.6  | 0.12 |
| 1       | 0.5     | 30        | 12.5  | 3.9  | 85.6  | 0.44 |
| 2       | 0.5     | 30        | 0.562 | 7.4  | 205.6 | 0.89 |
| 3       | 0.5     | 30        | 3.09  | 3.6  | 76.1  | 0.68 |
| 4       | 0.5     | 30        | 2.02  | 7.2  | 147   | 1    |
| 5       | 0.5     | 30        | 1.47  | 10.1 | 248.8 | 0.83 |
| 6       | 0.5     | 30        | 6.88  | 1.6  | 93.8  | 0.27 |
| 7       | 0.5     | 30        | 12.2  | 1.1  | 197.4 | 0.22 |
| 8       | 0.5     | 30        | 3.71  | 3.2  | 101.2 | 0.28 |
| 9       | 0.5     | 30        | 3.87  | 2.6  | 108.8 | 0.27 |
| 10      | 0.5     | 30        | 1.16  | 3.3  | 99.1  | 0.46 |
| 11      | 0.5     | 30        | 1.3   | 5.7  | 138.3 | 0.73 |
| 12      | 0.5     | 30        | 0.126 | 1.6  | 93    | 0.21 |
| 13      | 0.5     | 30        | 3.78  | 7.2  | 125.8 | 0.82 |
| 14      | 0.5     | 30        | 2.05  | 0.6  | 100.8 | 0.14 |
| 15      | 0.5     | 30        | 0.037 | 0.5  | 353.7 | 0.13 |
| 16      | 0.5     | 30        | 8.22  | 1.3  | 49.9  | 0.13 |
| 17      | 0.5     | 30        | 2.4   | 2.8  | 90.6  | 0.45 |
| 18      | 0.5     | 30        | 1.53  | 1.6  | 89.5  | 0.15 |
| 1       | 1       | 30        | 11.6  | 3.6  | 131.8 | 0.42 |
| 2       | 1       | 30        | 0.515 | 7.6  | 300.2 | 0.89 |
| 3       | 1       | 30        | 3.1   | 3.2  | 99.4  | 0.69 |
| 4       | 1       | 30        | 1.84  | 6.9  | 228.9 | 0.95 |
| 5       | 1       | 30        | 1.39  | 10.9 | 335.8 | 0.82 |
| 6       | 1       | 30        | 7.2   | 1.4  | 123.4 | 0.29 |
| 7       | 1       | 30        | 11.5  | 1.5  | 353.7 | 0.19 |

|    |   |    |       |     |       |      |
|----|---|----|-------|-----|-------|------|
| 8  | 1 | 30 | 4.31  | 0.5 | 286   | 0.29 |
| 9  | 1 | 30 | 4.03  | 2.7 | 261.4 | 0.26 |
| 10 | 1 | 30 | 1.03  | 2.6 | 217.8 | 0.44 |
| 11 | 1 | 30 | 1.35  | 4   | 145.8 | 0.69 |
| 12 | 1 | 30 | 0.133 | 1.9 | 291   | 0.19 |
| 13 | 1 | 30 | 3.33  | 7.6 | 120.7 | 0.82 |
| 14 | 1 | 30 | 2.1   | 0.7 | 198   | 0.15 |

| FT3  | Sex | Age | Race  | Etiology   | Weight.(kg) | T1_AM      |
|------|-----|-----|-------|------------|-------------|------------|
| 2.31 | F   | 25  | Hisp  | Hashimotos | 81.9        | 8.07136034 |
| 3.32 | F   | 24  | Caus  | Hashimotos | 65          | 0          |
| 2.88 | F   | 35  | Asian | Hashimotos | 55.5        | 2.05257663 |
| 3.52 | M   | 43  | Caus  | Hashimotos | 94.7        | 0          |
| 3.46 | F   | 24  | Caus  | Hashimotos | 68.3        | 11.8305297 |
| 2.33 | F   | 45  | Caus  | Hashimotos | 81          | 7.14874336 |
| 2.36 | F   | 56  | AA    | Hashimotos | 66.5        | 14.8543153 |
| 2.5  | F   | 31  | Caus  | Hashimotos | 79.6        | 10.8070192 |
| 2.02 | F   | 40  | Caus  | Hashimotos | 78.9        | 4.61795023 |
| 2.28 | F   | 41  | Caus  | Hashimotos | 69.2        | 4.72057306 |
| 3.29 | F   | 32  | AA    | Hashimotos | 131.2       | 3.10361757 |
| 3.84 | F   | 24  | Caus  | Hashimotos | 100.2       | 9.54904128 |
| 2.98 | F   | 35  | Caus  | Hashimotos | 88.3        | 7.03477395 |
| 2.4  | F   | 47  | Caus  | Hashimotos | 119         | 1.72152859 |
| 3    | F   | 47  | Caus  | Hashimotos | 52.8        | 6.61313177 |
| 1.7  | M   | 50  | AA    | ThyX       | 96.9        | 3.77064303 |
| 2.3  | F   | 50  | Caus  | Hashimotos | 68.3        | 1.82742244 |
| 1.62 | F   | 36  | Caus  | Hashimotos | 74.5        | 1.03980753 |
| 2.66 | F   | 25  | Hisp  | Hashimotos | 81.9        | 6.25789184 |
| 3.56 | F   | 24  | Caus  | Hashimotos | 65          | 0          |
| 2.87 | F   | 35  | Asian | Hashimotos | 55.5        | 2.5673881  |
| 4.49 | M   | 43  | Caus  | Hashimotos | 94.7        | 4.69178393 |
| 4.76 | F   | 24  | Caus  | Hashimotos | 68.3        | 12.9135444 |
| 3.18 | F   | 45  | Caus  | Hashimotos | 81          | 7.25949636 |
| 5.46 | F   | 56  | AA    | Hashimotos | 66.5        | 16.8726483 |
| 2.81 | F   | 31  | Caus  | Hashimotos | 79.6        | 9.96270164 |
| 2.79 | F   | 40  | Caus  | Hashimotos | 78.9        | 7.55671632 |
| 2.9  | F   | 41  | Caus  | Hashimotos | 69.2        | 5.94118803 |
| 4.21 | F   | 32  | AA    | Hashimotos | 131.2       | 1.62969621 |
| 2.53 | F   | 24  | Caus  | Hashimotos | 100.2       | 7.35272174 |
| 3    | F   | 35  | Caus  | Hashimotos | 88.3        | 9.71674299 |
| 2.34 | F   | 47  | Caus  | Hashimotos | 119         | 1.94470364 |
| 8.47 | F   | 47  | Caus  | Hashimotos | 52.8        | 4.76984686 |
| 1.76 | M   | 50  | AA    | ThyX       | 96.9        | 1.49512246 |
| 2.41 | F   | 50  | Caus  | Hashimotos | 68.3        | 5.65824291 |
| 2.17 | F   | 36  | Caus  | Hashimotos | 74.5        | 1.98040237 |
| 3.64 | F   | 25  | Hisp  | Hashimotos | 81.9        | 6.37173767 |
| 5.16 | F   | 24  | Caus  | Hashimotos | 65          | 0          |

|      |   |    |       |            |       |            |
|------|---|----|-------|------------|-------|------------|
| 4.33 | F | 35 | Asian | Hashimotos | 55.5  | 1.60571887 |
| 6.38 | M | 43 | Caus  | Hashimotos | 94.7  | 4.84052615 |
| 6.43 | F | 24 | Caus  | Hashimotos | 68.3  | 12.7037188 |
| 4.36 | F | 45 | Caus  | Hashimotos | 81    | 5.79574924 |
| 8.82 | F | 56 | AA    | Hashimotos | 66.5  | 15.7742356 |
| 6.55 | F | 31 | Caus  | Hashimotos | 79.6  | 9.95322233 |
| 5.06 | F | 40 | Caus  | Hashimotos | 78.9  | 7.47028912 |
| 5.49 | F | 41 | Caus  | Hashimotos | 69.2  | 4.28569242 |
| 4.41 | F | 32 | AA    | Hashimotos | 131.2 | 3.1610294  |
| 4.97 | F | 24 | Caus  | Hashimotos | 100.2 | 0          |
| 2.95 | F | 35 | Caus  | Hashimotos | 88.3  | 10.4170504 |
| 4.03 | F | 47 | Caus  | Hashimotos | 119   | 1.3029281  |

## T2

0.50198679

0.56520977

0.44287

2.02524558

1.28503976

0.77481922

1.1119973

0.92968295

0.97842302

0.96491222

1.03656728

0.47241755

1.01006774

0.68038307

0.49890778

0.66406372

0.75995792

0.8809594

0.45944339

0.97126974

0.53094089

1.50198012

1.40575902

0.55375611

1.29038297

0.98671801

0.91446243

0.87154085

1.0742467

0.458561

0.8645137  
0.6419527  
0.44483844  
0.70199974  
0.82275997  
0.96759049  
0.43192389  
0.71550904  
0.51989919  
1.60479992  
1.35625751  
0.57448796  
1.25705413  
0.82789053  
0.83228586  
0.94115366  
0.95412035  
0  
0.85375398  
0.66646274  
0.43654645  
0.58965868  
0.8600566  
1.01856874  
0.44883528  
0.63214454  
0.50618391  
1.30018503  
1.19724195  
0.58006603  
1.49603033  
0.79345833  
1.04174679  
1.39917832  
1.04576082  
0.44980116  
0.79812628  
0.77129909  
0.45485123  
0.541323  
1.35923771  
1.19623283  
0.41140404

0.61997444  
0.48461255  
1.31417018  
1.27304666  
0.51096747  
1.42805685  
0.7898742  
0.79212155  
1.61086152  
1.03819605  
0.35758272  
0.68785068  
0.94664705  
0.30263177  
0.4595843  
1.23911095  
1.49926132  
0.36692351  
0.63388769  
0.55852046  
1.64458862  
0.69658261  
0.49734653  
1.85186899  
0.83796341  
1.07712915  
1.46471458  
1.02353394  
0.24559582  
0.68902984  
0.98406663  
0.36820818  
0.49655934  
1.01279294  
2.03979321  
0.45529948  
0.6946822  
0.43808355  
1.74401822  
1.08404694  
0.49296273  
2.00209937  
0.93872424

1.26756087  
1.40711564  
0.95401885  
0.4147179  
0.81065065  
0.99774814  
0.65220661  
0.50799675  
0.97124685  
2.03289603  
0.22385334  
0.70490879  
0.45487103  
1.72812633  
1.25915645  
0.38771422  
1.76139418  
1.12059185  
1.18263785  
1.42466666  
0.86849944  
0.35486372  
0.72188888  
1.00854412  
0.55403835  
0.50293556  
0.89966883  
2.103292  
0.2770099  
0.7391173  
0.51075421  
2.20175897  
1.38299224  
0.42229486  
1.79780305  
0.9804577  
1.45159652  
1.51690159  
0.92481239  
0.37619405  
0.71950104  
0.93496507  
0.69516609

0.48653064  
0.98981904  
1.60352744  
0.69940351  
0.76031882  
0.74413412  
1.828905  
1.30328654  
0.39960994  
1.64153598  
0.86797968  
1.71797919  
1.3191878  
1.02380693  
0.38166567  
0.66029897  
0.90919483  
0.63608564  
0.47610476  
0.975803  
1.64246375
